# Supplementary material for: Fabrication of an AAO-based surface-enhanced Raman scattering substrate for the identification of levofloxacin in milk
Source: Royal Society of Chemistry journal article supplement (doi:10.1039/d1nj00642h), 2021-01-01
Supplement: d1nj00642h1.pdf [file d1nj00642h1.pdf]

*New Journal of Chemistry*

## **Supporting Information**

### **Fabrication of an AAO-Based Surface-Enhanced Raman Scattering**

#### **Substrate for the Identification of Levofloxacin in Milk**

Nan LI, <sup>ab</sup> Siqingaowa HAN,<sup>\*ac</sup> Shuang LIN, <sup>a</sup> Xuan-yu SHA, <sup>a</sup> and Wuliji HASI<sup>\*a</sup>

a. National Key Laboratory of Science and Technology on Tunable Laser, Harbin Institute of Technology, Harbin 150080, China.

b. College of Art and Sciences, Northeast Agricultural University, Harbin 150030, China.

c. Affiliated Hospital of Inner Mongolia University for Nationalities, Tongliao 028043, China.

## List of supplementary material

**Fig. S1** (a) Protein in milk was deposited by 15% trichloroacetic acid, and the sample was shaken slightly. (b) The sample was centrifuged. (c) The supernatant was filtered through a 0.22  $\mu\text{m}$  filter. (d) The filtrate used for testing.

**Fig. S2** Raw UV-visible absorption spectra of three different sized Ag colloids

**Fig. S3** The number distribution of the three different sized Ag NPs in the AAO holes: (a) 59 nm, (b) 41 nm, and (c) 29 nm.

**Fig. S4** UV-visible absorption spectra of a blank AAO template and the Ag NP-AAO SERS substrate

**Fig. S5** SERS spectra of the levofloxacin aqueous solution with different concentrations based on AAO-based SERS Substrate with 41 nm Ag NPs. The laser energy is 60 mW and the integration time is 5 s.

**Table S1** A performance comparison of Ag NPs with different particle sizes assembled in AAO-based SERS substrate

**Table S2** A comparison of methods used for the detection of antibiotics in milk

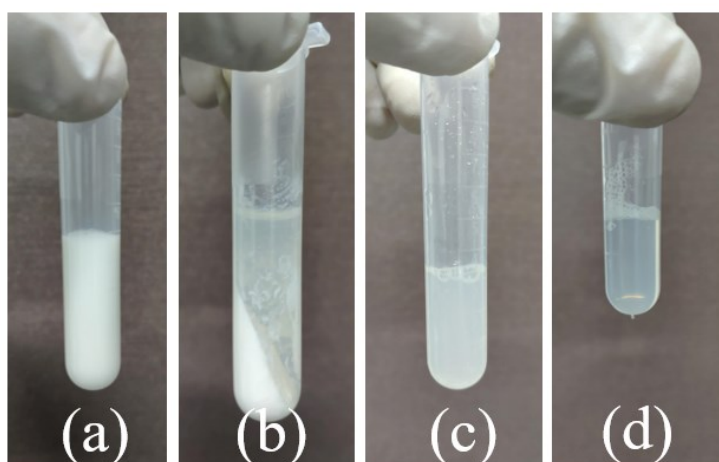

**Fig. S1** (a) Protein in milk was deposited by 15% trichloroacetic acid, and the sample was shaken slightly. (b) The sample was centrifuged. (c) The supernatant was filtered through a 0.22  $\mu\text{m}$  filter. (d) The filtrate used for testing.

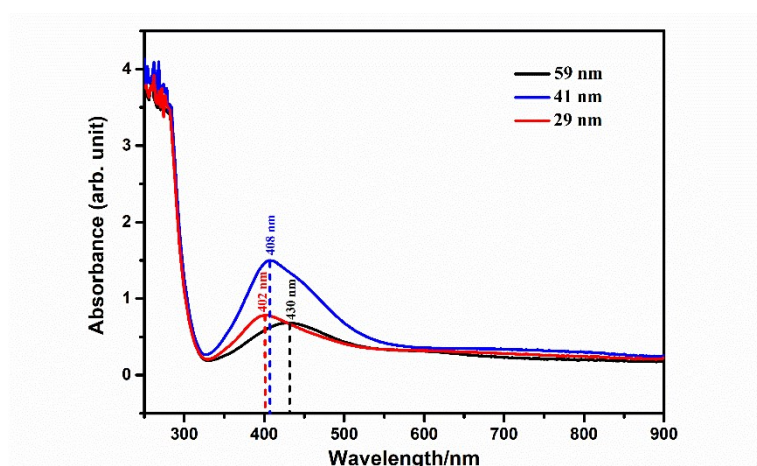

**Fig. S2** Raw UV-visible absorption spectra of three different sized Ag colloids

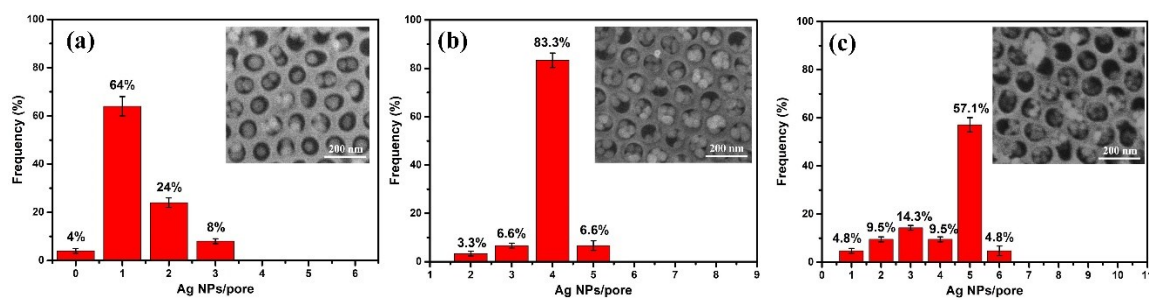

**Fig. S3** The number distribution of the three different sized Ag NPs in the AAO holes: (a) 59 nm, (b) 41 nm, and (c) 29 nm.

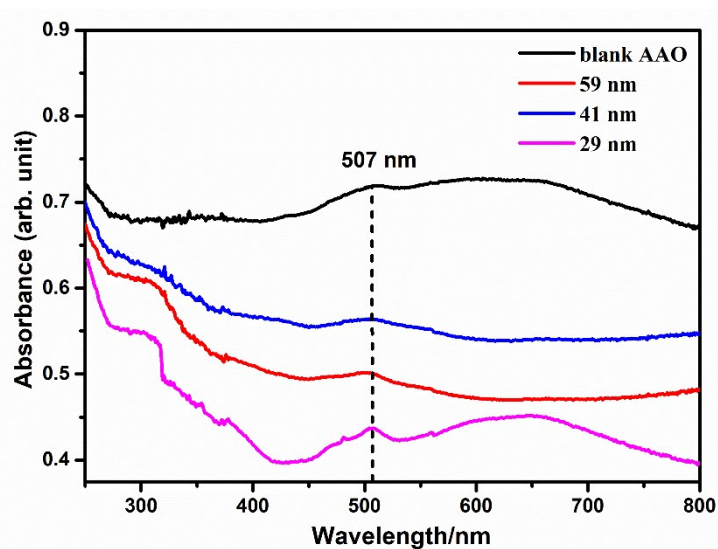

**Fig. S4** UV-visible absorption spectra of a blank AAO template and the Ag NP-AAO SERS substrate

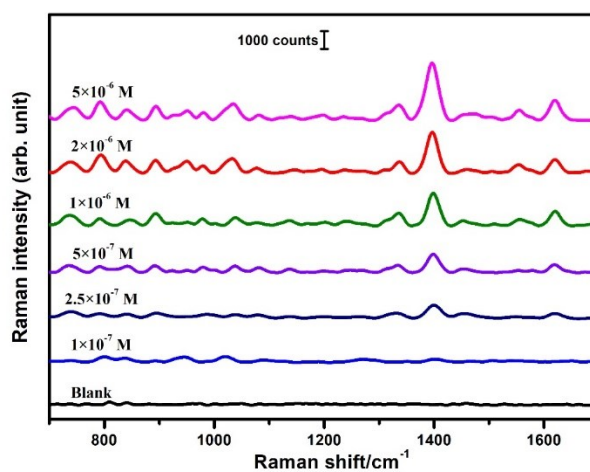

**Fig. S5** SERS spectra of the levofloxacin aqueous solution with different concentrations based on AAO-based SERS Substrate with 41 nm Ag NPs. The laser energy is 60 mW and the integration time is 5 s.

Table S1 A performance comparison of Ag NPs with different particle sizes assembled in AAO-based SERS substrate

| Particle size, nm | The number distribution in the AAO | Yields of distribution, % | AEF                |
|-------------------|------------------------------------|---------------------------|--------------------|
| 29                | 5                                  | 57.1                      | $1.04 \times 10^6$ |
| 41                | 4                                  | 83.3                      | $1.17 \times 10^6$ |
| 59                | 1                                  | 64                        | $0.86 \times 10^6$ |

Table S2 A comparison of methods used for the detection of antibiotics in milk

| Method                                                                     | Limit of detection         | Linear range                               | Time required for detection | Requirement for large-scale instruments | Reference |
|----------------------------------------------------------------------------|----------------------------|--------------------------------------------|-----------------------------|-----------------------------------------|-----------|
| Liquid chromatography coupled with tandem mass spectrometry (LC-MS/MS)     | 3.56 $\mu\text{g kg}^{-1}$ | 0.5~100 $\mu\text{g kg}^{-1}$              | 30~90 min                   | Yes                                     | [1]       |
| High performance liquid chromatography equipped with UV detector (HPLC-UV) | 0.02 $\mu\text{g mL}^{-1}$ | 0.08~2 $\mu\text{g mL}^{-1}$               | 30 min~6 hr                 | Yes                                     | [2]       |
| SERS                                                                       | $1.88 \times 10^{-6}$ M    | $1 \times 10^{-6} \sim 2 \times 10^{-5}$ M | 30 min                      | No                                      | This work |

## References

1. U. Acaroz, S. Ince, D. Arslan-Acaroz, I. Kucukkurt and A. Eryavuz, *Kafkas Universitesi Veteriner Fakultesi Dergisi*, 2020, **26**, 97-102.
2. M. Negarian, A. Mohammadinejad and S. A. Mohajeri, *Food Chem.*, 2019, **288**, 29-38.
